# Supplementary material
Source: HighWire-hosted journal article supplement (https://bmjopenquality.bmj.com/highwire/filestream/136226/field_highwire_adjunct_files/1/ds3783.pdf)
Supplement: ds3783.pdf [file ds3783.pdf]

Cleaning and Disinfection Technique Compliance Rate 1st Quarter 2013 - 1st Quarter 2014

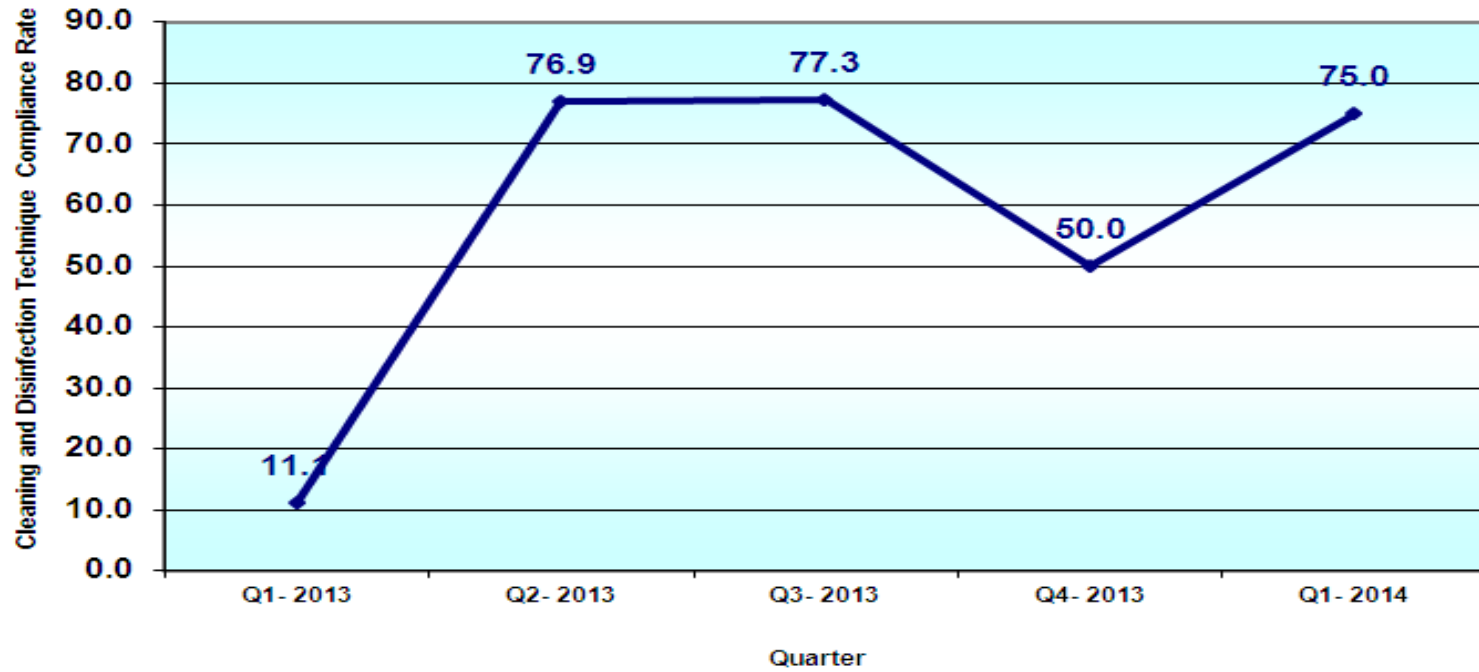

—●— Cleaning and Disinfection Technique Compliance Rate
